# Supplementary material for: Mechanistic insights into the key role of methylammonium iodide in the stability of perovskite materials
Source: Royal Society of Chemistry journal article supplement (doi:10.1039/d3ra01304a), 2023-01-01
Supplement: d3ra01304a1.pdf [file d3ra01304a1.pdf]

## Supplementary Information

### Mechanistic insights of the key role of methylammonium iodide in the stability of perovskite material

Negin Sabahi and Hashem Shahroosvand\*

Table S1: History of studies related to MAI

|                       |           | PbI <sub>2</sub> /MAI | Additive                                      | Condition                                                                    | Ref.   | Year           |
|-----------------------|-----------|-----------------------|-----------------------------------------------|------------------------------------------------------------------------------|--------|----------------|
| Methylammonium iodide | Precursor | 1, 1                  | H <sub>2</sub> O <sub>(Trace)</sub>           | MAI <sub>Assay</sub> (H <sub>4</sub> P <sub>2</sub> O <sub>6</sub> ) dipping | 1, 2 3 | 2016-2017-2016 |
|                       |           | 1,1, 1                | HI, CH <sub>3</sub> I                         | MAI <sub>loading time</sub> , co-evaporation                                 | 2, 4 5 | 2016-2015-2016 |
|                       |           | 1/3                   | DMSO                                          | MAI <sub>Vapor-based</sub>                                                   | 6 7    | 2021-2020      |
|                       |           | 1                     |                                               | MAI <sub>Purity, Vapor-Phase</sub>                                           | 8      | 2022           |
|                       |           | 1                     |                                               | PbI <sub>2</sub> powder+MAI                                                  | 9      | 2016           |
|                       |           | 1/4                   |                                               | Precursor Temperature, one step                                              | 10     | 2021           |
|                       |           | 1/2, 1/3, 1/5         |                                               | MAI <sub>time of dipping</sub>                                               | 11     | 2018           |
|                       |           | 1                     |                                               | MAI-based co-evaporation                                                     | 12     | 2019           |
|                       |           | 1                     |                                               | MAI aged                                                                     | 13     | 2021           |
|                       |           | 1                     |                                               | MAI co-evaporation                                                           | 14     | 2016           |
|                       |           | -                     |                                               | Computational details                                                        | 15     | 2019           |
|                       |           | 1                     |                                               | PbI <sub>x</sub> :MAAc:MAI                                                   | 16     | 2017           |
|                       |           | 1                     |                                               | BAI:MAI:PbI <sub>2</sub> :NH <sub>4</sub> SCN                                | 17     | 2017           |
|                       |           | 1                     |                                               | Synchrotron source                                                           | 18     | 2022           |
|                       |           | 1                     |                                               | Thermal co-evaporation                                                       | 2      | 2016           |
|                       | 1         |                       | Phase diagram one step                        | 19                                                                           | 2017   |                |
|                       | Post-syn  | 10%                   | MAI <sub>excess</sub> + CsPbI <sub>2</sub> Br |                                                                              | 20     | 2020           |
|                       |           | -10% to 10%           |                                               | MAI <sub>extra-stoichiometric</sub>                                          | 21     | 2019           |
|                       |           | (10,30)mM             |                                               | MAI <sub>post-treatment</sub>                                                | 22 23  | 2019-2022      |
|                       |           | Partial pressure      |                                               | MSGG                                                                         | 24     | 2021           |

### References:

1. C. Aranda, C. Cristobal, L. Shooshtari, C. Li, S. Huettner and A. Guerrero, *Sustainable Energy & Fuels*, 2017, **1**, 540.
2. N. Adhikari, A. Dubey, E. A. Gaml, B. Vaagensmith, K. M. Reza, S. A. A. Mabrouk, S. Gu, J. Zai, X. Qian and Q. Qiao, *Nanoscale*, 2016, **8**, 2693.
3. I. Levchuk, Y. Hou, M. Gruber, M. Brandl, P. Herre, X. Tang, F. Hoegl, M. Batentschuk, A. Osvet and R. Hock, *Advanced Materials Interfaces*, 2016, **3**, 1600593.
4. T. G. Kim, S. W. Seo, H. Kwon, J. Hahn and J. W. Kim, *Physical chemistry chemical physics*, 2015, **17**, 24342.
5. Y. Cheng, H.-W. Li, J. Zhang, Q.-D. Yang, T. Liu, Z. Guan, J. Qing, C.-S. Lee and S.-W. Tsang, *Journal of Materials Chemistry A*, 2016, **4**, 561.
6. F. Sahli, N. Miaz, N. Salsi, C. Bucher, A. Schafflutz, Q. Guesnay, L. Duchêne, B. Niesen, C. Ballif and Q. Jeangros, *ACS Applied Energy Materials*, 2021, **4**, 4333.

7. S. H. Lee, S. Hong, S. An, T.-Y. Jeon and H. J. Kim, *Electronic Materials Letters*, 2020, **16**, 588-594.
8. M. Roß, M. B. Stutz and S. Albrecht, *Solar RRL*, 2022, **6**, 2200500.
9. M. B. Johansson, T. Edvinsson, S. Bitter, A. I. Eriksson, E. M. Johansson, M. Göthelid and G. Boschloo, *ECS Journal of Solid State Science and Technology*, 2016, **5**, P614.
10. S. Raj Mohan, M. Joshi, T. Dhami, S. Rai and R. Singh, *Journal of Materials Science: Materials in Electronics*, 2021, **32**, 2459.
11. D. A. A. Leal, B. Krishnan, S. Shaji and D. A. Avellaneda, *Materials Chemistry and Physics*, 2018, **215**, 137.
12. R. Kottokkaran, H. A. Gaonkar, H. A. Abbas, M. Noack and V. Dalal, *Journal of Materials Science: Materials in Electronics*, 2019, **30**, 5487-5494.
13. S. Mandati, E. Ramasamy, S. Mallick, T. Rao and G. Veerappan, *Materials Letters*, 2021, **299**, 130056.
14. Y.-Y. Huang, G. Gollavelli, Y.-H. Chao and C.-S. Hsu, *Journal of Materials Chemistry C*, 2016, **4**, 7595.
15. L. Zhang, B. Wu, S. Lin and J. Li, *Russian Journal of Physical Chemistry A*, 2019, **93**, 2694.
16. S. Venkatesan, M. Hasan, J. Kim, N. R. Rady, S. Sohal, E. Neier, Y. Yaoc and A. Zakhidova, *Journal of Materials Chemistry C*, 2017, **5**, 10114.
17. X. Zhang, G. Wu, S. Yang, W. Fu, Z. Zhang, C. Chen, W. Liu, J. Yan, W. Yang and H. Chen, *Small*, 2017, **13**, 1700611.
18. Z. Inamul Hasan, S. Joshi and K. Subbaya, *Journal of Materials Science: Materials in Electronics*, 2022, **33**, 16369.
19. A. Mishra, D. Hodges and R. Misra, *Materials Research Express*, 2017, **4**, 096201.
20. K. S. Kim, I. S. Jin, S. H. Park, S. J. Lim and J. W. Jung, *ACS applied materials & interfaces*, 2020, **12**, 36228.
21. K. Liao, J.-a. Yang, C. Li, T. Li and F. Hao, *ACS applied materials & interfaces*, 2019, **11**, 39882.
22. A. Kogo, T. Miyadera and M. Chikamatsu, *ACS applied materials & interfaces*, 2019, **11**, 38683.
23. R. P. Srivastava, J. Lee and D.-Y. Khang, *Surfaces and Interfaces*, 2022, **29**, 101703.
24. H. Fan, J.-H. Huang, L. Chen, Y. Zhang, Y. Wang, C. Gao, P. Wang, X. Zhou, K.-J. Jiang and Y. Song, *Journal of Materials Chemistry A*, 2021, **9**, 7625.
